## **Nutrition and PI3K/Akt signaling are required for p38-dependent regeneration**

José Esteban-Collado, Montserrat Corominas and Florenci Serras

Department of Genetics, Microbiology and Statistics, School of Biology, University of Barcelona and Institute of Biomedicine of the University of Barcelona (IBUB), Diagonal 643, 08028 Barcelona, Spain.

## Summary

Regeneration after damage requires early signals to trigger the tissue repair machinery. Reactive oxygen species (ROS) act as early signals that are sensed by the MAP3 kinase Ask1, which in turn activates by phosphorylation the MAP kinases p38 and JNK. The sustained or high activation of these kinases can result in apoptosis, whereas short or low activation can promote regeneration. In the Ask1-dependent regeneration program, we demonstrate that PI3K/Akt signaling is necessary for Ask1 to activate p38, but not JNK. In addition, nutrient restriction or mutations that target Ser83 of the *Drosophila* Ask1 protein, a PI3K/Akt-sensitive residue, block regeneration. However, these effects can be reversed by the ectopic activation of p38, but not of JNK. Our results demonstrate that Ask1 controls the activation of p38 through Ser83 and that the phosphorylation of p38 during regeneration is nutrient-sensitive. This mechanism is important for discriminating between p38 and JNK in the cells involved in tissue repair and regenerative growth.

## Introduction

One of the most exciting questions in regenerative biology is how damaged cells signal to their surviving neighbors to stimulate tissue repair (Hariharan and Serras, 2017). The stress-activated MAP kinases Jun N-terminal kinase (JNK) and p38 respond to the oxidative stress generated by damaged cells (Diwanji and Bergmann, 2018; McCubrey et al., 2006; Serras, 2016). These multitasking kinases regulate a variety of cell functions including healing, growth and apoptosis (Martínez-Limón et al., 2020). Several MAP3 kinases are known to operate upstream of JNK and p38 (Sakauchi et al., 2017; Son et al., 2013; Takeda et al., 2008). Apoptosis signal-regulating kinase 1 (Ask1), a MAP3 kinase that upon oxidative stress oligomerizes to become activated (Sakauchi et al., 2017), has emerged as a potential signal in the damage response in *Drosophila* epithelia (Patel et al., 2019; Santabárbara-Ruiz et al., 2019; Toshniwal et al., 2019). In its inactive form, Ask1 is bound to its inhibitor thioredoxin (Saitoh et al., 1998). Upon oxidative stress, thioredoxin dissociates from the thioredoxin-binding domain of Ask1, enabling Ask1 to oligomerize and its threonine-rich kinase domain to autophosphorylate, leading to its activation and function as a MAP3 kinase (Fig. 1A) (Liu et al., 2000; Nishida et al., 2017; Saitoh et al., 1998).

Genetically induced cell death in *Drosophila* imaginal discs results in oxidative stress that activates p38 and JNK, triggering regeneration (Brock et al., 2017; Fan et al., 2014; Fogarty et al., 2016; Fox et al., 2020; Herrera and Morata, 2014; Herrera et al., 2013; Khan et al., 2017; Santabárbara-Ruiz et al., 2015; Santabárbara-Ruiz et al., 2019; Serras, 2016). In this context, Ask1 acts upstream of p38 and JNK and is sensitive to reactive oxygen species (ROS) (Patel et al., 2019; Santabárbara-Ruiz et al., 2019). Phosphorylation of p38 is an early response to damage that occurs alongside JNK (Santabárbara-Ruiz et al., 2019). However, JNK can also trigger apoptosis (Pinal et al., 2019). How increased p38 phosphorylation can coexist with tolerable, presumably low, levels of JNK remains unclear.

There are many observations that support an antagonism between p38 and JNK, mainly reinforced by the finding that p38 can negatively regulate JNK activity in mammalian cells (Wagner and Nebreda, 2009). For example, the inhibition of p38 in mammalian myoblasts, epithelial cells and macrophages leads to the activation of JNK (Cheung et al., 2003; Perdiguero et al., 2007). Moreover, Jun-deficient hepatocytes show increased p38 $\alpha$  phosphorylation (Stepniak et al., 2006). Therefore, we speculated that the mechanism that activates p38 during *Drosophila* regeneration operates concomitantly with a reduction of JNK. As MAP3 kinases are key regulators of MAPK activity, we decided to investigate how Ask1 discriminates between p38 and JNK and particularly how Ask1 fuels p38-dependent regeneration.

We previously showed that the Ser83 residue of the *Drosophila* Ask1 protein is required for tissue repair and that phosphorylation of Ask1 at Ser83 depends on PI3K/Akt signaling (Santabárbara-Ruiz et al., 2019). Insulin signaling through the PI3K/Akt pathway indicates the nutritional status of an animal and regulates tissue growth (Hietakangas and Cohen, 2009). Here, we present evidence that the Ser83 residue of Ask1 is key for activating p38, but not JNK, therefore, discriminating between p38 and JNK. Moreover, we show that nutrients and PI3K/Akt signaling are necessary for p38 activation in cells involved in regeneration.

## Results and Discussion

### Activation of p38 but not JNK requires the Ser83 residue of Ask1

The YH\_GVRESF sequence located in the N-terminal region of Ask1 is highly conserved from sponges to humans (Fig. 1A and Fig. S1A). This sequence is present in the Ask1-PC isoform of *Drosophila* and contains the Ser83 residue (Ser174 in humans and Ser181 in mouse). Phosphorylation of Ser83 by Akt is required to control Ask1 kinase activity, occurring in the same cells that activate p38 during regeneration (Santabárbara-Ruiz et al., 2019). This prompted us to hypothesize that Ser83 of the Ask1 protein could be essential for p38 activation.

We previously demonstrated that the ectopic activation of wild-type Ask1 (*UAS-Ask1<sup>WT</sup>*) resulted in a moderate increase in Ask1 activity in the absence of extra thioredoxin inactivation (Santabárbara-Ruiz et al., 2019). Ectopic expression of *Ask1<sup>WT</sup>* in wing imaginal discs using the *patched-Gal4* driver (hereafter *ptc*>) did not increase phosphorylated p38 (P-p38) levels beyond basal values (Fig. 1B-C). Since the sole expression of *Ask1* is not enough to phosphorylate p38, we decided to determine whether p38 phosphorylation requires Akt and the Ser83 residue of Ask1. We used *ptc-Gal4* to drive the expression of three transgenic combinations and tested them for p38 activation, as follows: (1) In the control experiments, we ectopically expressed *Akt* and *GFP*. To activate Akt, we used the *UAS-Pdk1:UAS-Akt1* recombinant construct (hereafter *Pdk1:Akt*). This transgene allows co-expression of Akt and *phosphoinositide-dependent kinase-1* (*Pdk1*), the gene encoding the kinase downstream of the insulin pathway that phosphorylates and activates Akt1 (Fig. 1A'). This construct ensures the ectopic expression of both genes and the activation of Akt without killing the cell. In this transgenic combination, we co-expressed *Pdk1:Akt* with *UAS-GFP* as a neutral transgene. (2) One of the experimental conditions consisted of the ectopic expression of *Pdk1:Akt* and the wild-type form of Ask1 (*Ask1<sup>WT</sup>*) to test the activation of Ask1 by Akt. (3) The other experimental condition consisted of the co-expression of *Pdk1:Akt*

and the mutant *Ask1*<sup>S83A</sup>, which cannot undergo Akt-dependent phosphorylation at Ser83. We first tested whether Akt was active in these combinations using an antibody against phospho-Akt (P-Akt). This revealed that P-Akt concentrated in the *ptc* stripe with similar intensities in all three transgenic conditions (Fig. S1B-E).

We found that P-p38 did not significantly increase in the *ptc* stripe of cells when *Pdk1:Akt* was co-expressed with *GFP* (Fig. 1D). Instead, P-p38 significantly increased when *Pdk1:Akt* was co-expressed with *Ask1*<sup>WT</sup> (Fig. 1E and G). P-p38 was highly concentrated in the *ptc*> stripe, although some labeling could also be observed in the cells anterior to the stripe. It is conceivable that this anterior staining resulted from the persistence of the early *ptc-Gal4* expression in the anterior compartment rather than a non-autonomous effect from dying cells, since no or only a few dead cells (positive for caspase Dcp1) were found (Fig. S2A-C) (Bosch et al., 2016; Evans et al., 2009). By contrast, P-p38 did not increase when *Pdk1:Akt* was co-expressed with the mutant *Ask1*<sup>S83A</sup>, neither in the *ptc*> stripe nor in the anterior compartment (Fig. 1F and G). Therefore, we concluded that the Ser83 of the YH\_GVRESF sequence is essential for p38 activation in PI3K/Akt signaling.

The same genotypes were tested with an antibody that recognizes the activated and phosphorylated form of JNK (Fig. S2E, F), observing that the basal levels did not respond to the ectopic expression of *Pdk1:Akt*, the co-expression of *Pdk1:Akt* and *Ask1*<sup>WT</sup> or the co-expression of *Pdk1:Akt* and *Ask1*<sup>S83A</sup> (Fig. 2A-E). This was confirmed by analyzing matrix metalloproteinase 1 (MMP1), a known target of JNK signaling, which was only found to be associated with the very few apoptotic cells generated by the ectopic expression of the transgenes (Fig. S2A-D). These results demonstrated that the Akt-dependent phosphorylation of Ask1 at Ser83 is canalized through p38 and not through JNK, suggesting that the Ask1-dependent activation of JNK requires factors other than Akt.

The catalytically inactive *Ask1*<sup>K618M</sup> mutant acts as a dominant negative form that prevents phosphorylation of JNK (Kuranaga et al., 2002). We found that the increase of P-p38 in the discs co-expressing *Pdk1:Akt* and *Ask1*<sup>WT</sup> could not be reproduced after the co-expression of *Pdk1:Akt* and the *Ask1*<sup>K618M</sup> mutant (Fig. 1G, H). In addition, the co-expression of *Pdk1:Akt* and *Ask1*<sup>K618M</sup> did not elicit significant changes in P-JNK levels (Fig. 2E, F). The activity of Akt, as tested with the anti-P-Akt antibody, in the discs co-expressing *Pdk1:Akt* and *Ask1*<sup>K618M</sup> was similar to that of the other transgenic combinations (Fig. S1B-E, J). In conclusion, the inactive form of the Ask1 protein results in neither p38 nor JNK phosphorylation.

Ask1 activity was determined with an anti-P-Thr Ask1 antibody, a phosphothreonine antibody that targets the core of the Ask1 catalytic domain. This antibody showed increased staining in the discs co-expressing *Pdk1:Akt* and *Ask1<sup>S83A</sup>* compared to the *Pdk1:Akt*, *Ask1<sup>WT</sup>* and *Pdk1:Akt*, *Ask1<sup>K618M</sup>* discs (Fig. S1F-I, K). The co-expression of *Pdk1:Akt* and *Ask1<sup>WT</sup>* resulted in a very weak staining, although this was not statistically significant, suggesting that the ectopic expression of Akt attenuated P-Thr Ask1 levels (Fig. S1G). These results are consistent with previous observations showing a moderate increase in P-Thr Ask1 levels in *UAS-Ask1<sup>WT</sup>*-expressing cells and a strong increase in P-Thr Ask1 levels in the *Ask1<sup>S83A</sup>*-expressing cells, which concur with the role of Ser83 in the attenuation of Ask1 activity (Santabárbara-Ruiz et al., 2019). We propose here that this attenuation results in low levels of Ask1 activity that are still sufficient to activate p38. This is important for cell survival, as strong stimulation of Ask1 can result in apoptosis (Kuranaga et al., 2002).

Together, these observations indicate that the activation of p38, but not JNK, is the result of the cooperation between the Ask1 kinase domain and the Ser83 residue of the YH\_GVRESF sequence, which is tightly dependent on PI3K/Akt signaling.

### **Ectopic activation of p38 signaling rescues the defective regeneration caused by nutrient restriction**

As P-p38 depends on Akt, we decided to study the role of p38 in regeneration under conditions of nutrient restriction. To trigger regeneration, genetic ablation was induced using the modified version of the LexA (LHG) transactivator system that can be conditionally controlled with the temperature-sensitive *Gal80<sup>TS</sup>* (Yagi et al., 2010). We used the wing-specific *sa<sup>E/Pv</sup>* enhancer to drive the expression of LHG in the cells of the central part of the wing disc where the pro-apoptotic construct *lexO-rpr* was activated (*sa<sup>E/Pv</sup>-LHG lexO-rpr*). In addition, we used the transactivator Gal4/UAS to drive the expression of a second transgene (*UAS-GFP*, *UAS-lic<sup>WT</sup>* or *UAS-hep<sup>WT</sup>*) in the same individuals (Fig. 3A). The expression of any of these three transgenes driven by *nub-Gal4* in unablated discs did not affect the normal pattern of the wings, although a small reduction in size was detected for *UAS-lic<sup>WT</sup>* and *UAS-hep<sup>WT</sup>* in comparison to the control *UAS-GFP* (Fig. S3).

We first analyzed the wing imaginal discs of animals grown in standard food conditions (100% yeast concentration) in which we induced apoptosis (*sa<sup>E/Pv</sup>-LHG lexO-rpr*) and activated a neutral transgene (*nub-Gal4 UAS-GFP*). In these animals, wing discs showed P-p38 surrounding the apoptotic domain (Fig. 3B). Adult animals emerged with normally regenerated wings in 97% of the females and 89% of the

males, suggesting a high regeneration capability (Fig. 3E, F). In the controls kept at 17°C to block cell death, 100% of the wings were normal (Fig. 3G, H). The dimorphic phenotype could be due to the fact that females initiate metamorphosis at a larger body size than males and, also, females grow faster than males during the last phase of larval growth (Testa et al., 2013).

However, under conditions of nutrient restriction (10% yeast), P-p38 was absent in the wing discs (Fig. 3I) and the percentage of normally regenerated wings dropped to 67% in females and 50% in males (Fig. 3L, M). These animals had smaller wings (Fig. 3E, F, L, M) and showed a lack of veins and interveins as well as missing sectors of the wing (Fig. 3N, O). These results demonstrated that patterning and size of regenerated wings were affected by the nutritional status. In control animals (10% yeast) kept at 17°C to block cell death, the wings were normal, but smaller (Fig. 3N, O).

Next, we analyzed if ectopic activation of p38 could restore regeneration in nutrient restricted animals. Since constitutive activation of p38 can cause cell death (Huang et al., 2016; Sun et al., 2019), we used a wild-type allele of *licorne* (*lic<sup>WT</sup>*), a serine/threonine kinase that phosphorylates p38. This resulted in moderate levels of P-p38 and a few scattered apoptotic cells (Fig. S2G). Expression of *lic<sup>WT</sup>* under normal food conditions did not allow regeneration (Fig. 3E, F), likely because of the toxicity resulting from the excessive levels of P-p38 caused by both ectopic expression and genetic ablation (Fig. 3C). However, following nutrient restriction, the levels and distribution of P-p38 were similar to those of GFP in the animals grown in standard food conditions (compare Figure 3J with 3B). The percentage of regenerated wings in *lic<sup>WT</sup>*-expressing flies increased above 90 % (Fig. 3L, M). In addition, the wing size increased to levels that were similar to those of the controls at 17°C.

We also tested whether JNK could restore regeneration. JNK signaling was induced moderately by the expression of the wild-type form of the *Drosophila* JNKK, *hemipterous* (*hep<sup>WT</sup>*) (Uhlirva and Bohmann, 2006). The expression of *hep<sup>WT</sup>*, but not of *GFP* or *lic<sup>WT</sup>*, resulted in an increase of P-JNK (Fig. S4A-G). The activation of *hep<sup>WT</sup>* did not result in P-p38 around the apoptotic zone of the discs (Fig. 3C, J) and did not reverse the defects in regeneration resulting from nutrient restriction (Fig. 3E, F, L, M). Altogether, these results showed that *lic<sup>WT</sup>*, but not *hep<sup>WT</sup>*, was able to revert the effects of nutrient limitation, indicating that the p38 pathway is highly sensitive and responsive to nutrients to drive regeneration.

To further demonstrate that p38 activation was driven through the Ser83 residue of Ask1, we combined cell death with the expression of the *Ask1<sup>S83A</sup>* mutant (Fig. 4A). In these conditions, P-p38 levels were not beyond the basal levels (Fig. 4B), while wing regeneration dropped to around 10%, the wing size was reduced (Fig. 4E)



and wings showed patterning defects (Fig. 4G, H). Concomitant expression of *Ask1*<sup>S83A</sup> and *lic*<sup>WT</sup> resulted in higher levels of P-p38 (Fig. 4C), and an increase in the percentage of regenerated wings, to up to more than 67%, as well as an increase in the wing size (Fig. 4E, F), and recovering of the wing pattern (Fig. 4G, H). By contrast, P-p38 staining did not change after the ectopic expression of *Ask1*<sup>S83A</sup> and *hep*<sup>WT</sup> (Fig. 4D) and did not lead to recoveries in the percentages of regenerated wings, wing size or patterning (Fig. 4 E,-H). In these *Ask1*<sup>S83A</sup> experiments, the expression of *hep*<sup>WT</sup>, but not of *lic*<sup>WT</sup> or *GFP*, caused the phosphorylation of JNK in the *nub*> domain (Fig. S4H-K).

From our results, we concluded that Ser83 of the Ask1 YH\_GVRESF sequence is necessary for integrating nutrient signals and the insulin pathway to initiate the p38-dependent damage response. It has been demonstrated that Ask1 and p38 play an important role in the stress-triggered regeneration of the gut (Patel et al., 2019). Perhaps not only in discs, but also in other organs such as the gut, the synergy between ROS and nutrients/Akt through the Ser83 residue of Ask1 is necessary for the activation of p38.

p38 and JNK respond to damage differently. It is known that JNK is associated with cell death and that there is a mutual antagonism between p38 and JNK (Wagner and Nebreda, 2009). Dying cells lack P-p38, possibly because of a reduction of P-Akt levels in apoptotic cells (Franke et al., 2003), and therefore they are unable to attenuate P-Thr Ask1 activity. Indeed, P-Thr Ask1 has been found to be highly accumulated in the apoptotic zones of the disc (Santabárbara-Ruiz et al., 2019). We speculate that this could result in the activation of JNK in damaged cells, which then promotes apoptosis (Shlevkov and Morata, 2012). Although P-JNK is not abundant in dying cells, reporters of JNK signaling have been associated with apoptotic cells (Pinal et al., 2019). As previously suggested, the attenuated form of Ask1 might not only be key for p38 activation, but also for maintaining low levels of JNK in regenerating cells (Santabárbara-Ruiz et al., 2019). Therefore, both MAPKs play a role in regeneration, p38 in a manner that is dependent on nutrients and PI3K/Akt, and JNK independently of them. In addition to the attenuated or low levels of Ask1, the MAP3 kinase Tak1 could operate independently of nutrients to activate JNK (La Marca and Richardson, 2020).

In summary, we propose two roles for Ask1 in regenerating cells, one in the attenuation of catalytic activity to avoid cell death in regenerating cells and the other in the activation of p38 to propel regeneration. In the future, it will be fundamental to unveil the mechanisms of tissue repair triggered by p38.



## Material and Methods

### Drosophila strains

The *sal<sup>E/Pv</sup>-LHG*, *lexO-rpr*, *UAS-Ask1<sup>WT</sup>* and *UAS-Ask1<sup>S83A</sup>* *Drosophila melanogaster* strains have been previously described (Santabárbara-Ruiz et al., 2015; Santabárbara-Ruiz et al., 2019), as have *UAS-lic<sup>WT1.1</sup>* (Terriente-Félix et al., 2017), *UAS-hep<sup>WT</sup>* (Uhlírova and Bohmann, 2006), *UAS-Ask1<sup>K618M</sup>* (Kuranaga et al., 2002), *UAS-Pdk1* and *UAS-Pkb1/Akt1* (which were recombined and a gift from H. Stocker), and *sal<sup>E/Pv</sup>-Gal4* (Santabárbara-Ruiz et al., 2015). The following strains were provided by the Bloomington Drosophila Stock Center: *tubGal80<sup>TS</sup>* (RRID:BDSC\_7017), *ptc-Gal4* (RRID:BDSC\_2017), *UAS-GFP* (RRID:BDSC\_4776), and *UAS-Ask1<sup>RNAi</sup>* (RRID:BDSC\_35331). The following are described in FlyBase: *hh-Gal4*, *dpp-Gal4*, and *nub-Gal4*. The *UAS-bsk<sup>RNAi</sup>* strain was obtained from the Vienna Drosophila Resource Center (VDRC V104569).

### The Gal4/UAS/Gal80<sup>TS</sup> system for transgene activation in the wing imaginal disc

The *ptc-Gal4* strain expressed Gal4 in a central stripe of the wing imaginal discs. Experiments with the *UAS-Ask1<sup>K618M</sup>* mutant were also performed with *dpp-Gal4*. Both the *ptc-Gal4* and *dpp-Gal4* drivers show a similar pattern of expression in a stripe of cells.

The controls carried *ptc-Gal4 UAS-GFP* (*ptc>GFP*), whereas the other genotypes were stained with the anti-Ptc antibody to identify *ptc* zone.

A recombinant of two UAS lines was used to activate the PI3K/Akt pathway - *UAS-Pdk1:UAS-Akt1* (*Pdk1:Akt* in the text and figures). The expression of *UAS-Pdk1:UAS-Akt1* and the other transgenes was controlled by the thermo-sensitive Gal4 repressor *tubGal80<sup>TS</sup>*.

*Drosophila* crosses were cultured to lay eggs for 24 h at 17°C. Embryos were kept at 17°C until the 7th day (168 hours) after egg laying to prevent *UAS-Pdk1:UAS-Akt1* expression. Larvae were subsequently moved to 29°C for 24 h and then the imaginal discs from wandering larvae were dissected and processed for staining and immunofluorescence studies.

### Immunofluorescence and the TUNEL assay

Immunostainings were performed using standard protocols. The primary antibodies used in this study were: the Cleaved *Drosophila* Dcp1 antibody (Cell Signaling; 1:200), anti-Ptc antibody (DSHB; 1:100), anti-P-p38 antibody (Cell Signaling; 1:50), anti-P-Akt antibody (S473, Cell Signaling; 1:100), the rabbit anti-ACTIVE® JNK pAb (V7931,

Promega; 1:100), anti-MMP1 antibody (DSHB, 14A3D; 1:200) and anti-nubbin antibody (1:50; from S. Cohen). The anti-ACTIVE® JNK pAb antibody (anti-P-JNK) also labels mitoses as spindle pole proteins associate with JNK (Lim et al., 2015) and responds to the ectopic activation of the wild-type form of the JNKK *licorne* (*UAS-lic<sup>WT</sup>*) and a dominant negative form of the JNK *basket* (*UAS-bsk<sup>DN</sup>*) (Fig. S2). The anti-phospho-Ask1(Thr845) polyclonal antibody (Cell Signaling, 3765; 1:200) was also used, which labels residues surrounding Thr845 of mouse ASK1 only when Thr845 is phosphorylated. This antibody (P-Thr in Fig. S1) was used to monitor Ask1 activity.

Fluorescently labeled secondary antibodies were from Thermo Fisher Scientific. Nucleic acid staining was performed by incubating discs for 10 minutes with 1  $\mu$  M TO-PRO-3 (TP-3) or 10  $\mu$ g/mL of DAPI (Life Technologies). The discs were mounted in SlowFade (Thermo Fisher Scientific).

For the detection of apoptotic cells, we also used the TUNEL assay. We employed the fluorescently labeled Alexa Fluor® 647-aha-dUTP (Thermo Fisher Scientific), incorporated using terminal deoxynucleotidyl transferase (Roche). Apoptosis was also detected after Cleaved *Drosophila* Dcp1 antibody immunofluorescence.

### Image acquisition

For the confocal images, a Zeiss LSM880 and a Leica SPE confocal laser scanning microscopes were used. Images were analyzed using FIJI. Data on Mean pixel intensity graphics were collected from the *ptc* zone. A Leica DMLB microscope was used for taking pictures of the adult wings.

### Genetic ablation and the dual Gal4/LexA transactivation system

For adult wing regeneration analysis, we used a dual Gal4/LexA transactivation system. We used the *sal<sup>EPV</sup>-LHG* and *LexO-rpr* strains for genetic ablation, utilizing the same design as that for Gal4/UAS. The LHG is a modified version of lexA that contains the activation domain of Gal4 separated with a hinge construct. This form is suppressible by *tubGal80<sup>TS</sup>* (Yagi et al., 2010). The Gal-4 line used was *nubbin-Gal4* (*nub>*), which is expressed in the entire wing pouch. *UAS-GFP* (GFP) on an antibody against Nubbin (Nub) were used to monitor the *nub>* zone.

Animals laid eggs for 6 h at 17°C. Embryos were kept at 17°C until day 8 (192 hours after egg laying) to prevent *rpr* expression. They were subsequently moved to 29°C for 11 hours and then back to 17°C to allow the tissue to regenerate. Two types of controls were used in parallel for each genotype: (1) individuals carrying *UAS-GFP* as the neutral transgene, which were moved to 29°C for 11 hours, as in the

experimental condition; and (2) individuals kept continuously at 17°C to avoid any transgene activation to control for possible effects of transgene insertion. Colored bars in histograms correspond to the experiments of cell death induction and transgene expression conducted at 29°C. Gray bars correspond to the control experiments performed at 17°C without cell death induction or transgene expression. From the experiments performed at 29°C, a representative anomalous wing phenotype is shown in the corresponding figures.

In addition we scored wing pattern and size of the different transgenes expressed under the *nub-Gal4* in unablated discs.

### **Nutrient restriction conditions**

One liter of *Drosophila* medium contained 64 g of fresh yeast, 67.2 g of dextrose, 40 g of wheat flour and 8.8 g of Bacto agar, here referred to as standard medium (or 100% yeast food). Food for nutrient restriction (or 10% yeast food) was made by reducing the amount of yeast (6.4 g/l) without altering the other ingredients. All crosses and experiments were performed under non-crowding conditions.

Nutrient restriction experiments were performed as follows. Embryos were cultured at 17°C. On day 7 (168 hours) after egg laying, the larvae were removed from their standard food conditions, washed in PBS and transferred to a tube with only 10% yeast. In the control animals, the same procedure was followed, except that they were transferred to another tube containing standard food. Then, on day 8 (192 hours) after egg laying, the larvae were subsequently moved to 29°C for 11 hours to activate the whole set of transgenes as the inhibitor Gal80 is inactive at this temperature. After that, the larvae were transferred to 17°C to allow the tissue to regenerate. Thus, from 24 h before cell death induction, during the cell ablation period and during the entire regeneration process up to adulthood, the larvae were in conditions of nutrient restriction.

To exclude any toxicity due to the insertion of the transgene, all experiments were carried out in parallel, but constantly at 17°C to maintain *tubGal80<sup>TS</sup>* activity and block transgene (UAS- or lexO-) expression. In these conditions, no defects in patterning were detected. However, all the flies raised under starvation conditions presented smaller wings compared to flies reared on normal food.

### **Statistical analysis**

To test the capacity to regenerate in different genetic backgrounds, we examined adult wings obtained from *sal<sup>EPV</sup>>rpr* individuals in which patterning and size defects can be scored easily. Flies were fixed in glycerol:ethanol (1:2) for 24 hours. The wings were

dissected in water and then washed with ethanol. Subsequently, they were mounted in lactic acid:ethanol (6:5) and analyzed and imaged under a microscope.

The percentage of regenerated wings refers to fully regenerated (for genetic ablation genotypes) or normally developed wings (for testing transgenes) and was calculated according to the number of wings present with a complete set of veins and interveins as markers of normal patterning. Wing areas were measured as an indication of wing size. Areas of the mounted wings were outlined and scored using FIJI.

In all the statistical analyses (wing areas and mean pixel intensity graphics), error bars indicate the standard deviation of the mean. To make statistical comparisons, we used one-way analysis of variance (ANOVA) followed by Tukey's post-hoc test to make pair comparisons between each group using IBM SPSS Statistics.

Significance is indicated in the figures only when  $p < 0.05$ , using the following symbols: \* $p < 0.05$ , \*\* $p < 0.01$ , \*\*\* $p < 0.001$ .

## **Acknowledgments**

We thank Hugo Stocker, Mar Fernández, Paula Santa Bárbara, Carlos Camilleri and Paula Climent for their comments. We thank Manel Bosch from the CCI-T-UB imaging facilities for support and Concepcion Arenas for advice on statistical analysis.

## **Funding**

This research was funded by the grant PGC2018-099763-B-I00 from the Spanish Ministerio de Ciencia, Innovacion y Universidades to F.S. and M.C. and grants from the Institució Catalana de Recerca i Estudis Avançats (ICREA Academia award) to M.C and from the Agència de Gestió d'Ajuts Universitaris i de Recerca (2017SGR1455) to F.S. and M.C.

## References

- Bosch, J. A., Sumabat, T. M. and Hariharan, I. K.** (2016). Persistence of RNAi-Mediated Knockdown in *Drosophila* Complicates Mosaic Analysis Yet Enables Highly Sensitive Lineage Tracing. *Genetics* **203**, 109 LP – 118.
- Brock, A. R., Seto, M. and Smith-Bolton, R. K.** (2017). Cap-n-Collar Promotes Tissue Regeneration by Regulating ROS and JNK Signaling in the *Drosophila melanogaster* Wing Imaginal Disc. *Genetics* **206**, 1505–1520.
- Cheung, P. C. F., Campbell, D. G., Nebreda, A. R. and Cohen, P.** (2003). Feedback control of the protein kinase TAK1 by SAPK2a/p38 $\alpha$ . *EMBO J.* **22**, 5793–5805.
- Diwanji, N. and Bergmann, A.** (2018). An unexpected friend – ROS in apoptosis-induced compensatory proliferation: Implications for regeneration and cancer. *Semin. Cell Dev. Biol.*
- Evans, C. J., Olson, J. M., Ngo, K. T., Kim, E., Lee, N. E., Kuoy, E., Patananan, A. N., Sitz, D., Tran, P. T., Do, M. T., et al.** (2009). G-TRACE: Rapid Gal4-based cell lineage analysis in *Drosophila*. *Nat. Methods*.
- Fan, Y., Wang, S., Hernandez, J., Yenigun, V. B., Hertlein, G., Fogarty, C. E., Lindblad, J. L. and Bergmann, A.** (2014). Genetic models of apoptosis-induced proliferation decipher activation of JNK and identify a requirement of EGFR signaling for tissue regenerative responses in *Drosophila*. *PLoS Genet.* **10**, e1004131.
- Fogarty, C. E., Diwanji, N., Lindblad, J. L., Tare, M., Amcheslavsky, A., Makhijani, K., Brückner, K., Fan, Y. and Bergmann, A.** (2016). Extracellular Reactive Oxygen Species Drive Apoptosis-Induced Proliferation via *Drosophila* Macrophages. *Curr. Biol.*
- Fox, D. T., Cohen, E. and Smith-Bolton, R.** (2020). Model systems for regeneration: *Drosophila*. *Development* **147**, dev173781.
- Franke, T. F., Hornik, C. P., Segev, L., Shostak, G. A. and Sugimoto, C.** (2003). PI3K/Akt and apoptosis: Size matters. *Oncogene*.
- Hariharan, I. K. and Serras, F.** (2017). Imaginal disc regeneration takes flight. *Curr. Opin. Cell Biol.* **48**, 10–16.
- Herrera, S. C. and Morata, G.** (2014). Transgressions of compartment boundaries and cell reprogramming during regeneration in *Drosophila*. *Elife* **3**, e01831.
- Herrera, S. C., Martin, R. and Morata, G.** (2013). Tissue homeostasis in the wing disc of *Drosophila melanogaster*: immediate response to massive damage during development. *PLoS Genet.* **9**, e1003446.
- Hietakangas, V. and Cohen, S. M.** (2009). Regulation of Tissue Growth through Nutrient Sensing.

- Huang, D., Li, X., Sun, L., Huang, P., Ying, H., Wang, H., Wu, J. and Song, H.** (2016). Regulation of Hippo signalling by p38 signalling. *J. Mol. Cell Biol.* **8**, 328–337.
- Khan, S. J., Abidi, S. N. F., Skinner, A., Tian, Y. and Smith-Bolton, R. K.** (2017). The Drosophila Duox maturation factor is a key component of a positive feedback loop that sustains regeneration signaling. *PLoS Genet.* **13**,.
- Kuranaga, E., Kanuka, H., Igaki, T., Sawamoto, K., Ichijo, H., Okano, H. and Miura, M.** (2002). Reaper-mediated inhibition of DIAP1-induced DTRAF1 degradation results in activation of JNK in Drosophila. *Nat. Cell Biol.* **4**, 705–710.
- La Marca, J. E. and Richardson, H. E.** (2020). Two-Faced: Roles of JNK Signalling During Tumourigenesis in the Drosophila Model. *Front. Cell Dev. Biol.* **8**, 42.
- Lim, N. R., Yeap, Y. Y. C., Zhao, T. T., Yip, Y. Y., Wong, S. C., Xu, D., Ang, C. S., Williamson, N. A., Xu, Z., Bogoyevitch, M. A., et al.** (2015). Opposing roles for JNK and Aurora A in regulating the association of WDR62 with spindle microtubules. *J. Cell Sci.* **128**, 527–540.
- Liu, H., Nishitoh, H., Ichijo, H. and Kyriakis, J. M.** (2000). Activation of apoptosis signal-regulating kinase 1 (ASK1) by tumor necrosis factor receptor-associated factor 2 requires prior dissociation of the ASK1 inhibitor thioredoxin. *Mol. Cell Biol.* **20**, 2198–208.
- Martínez-Limón, A., Joaquin, M., Caballero, M., Posas, F. and de Nadal, E.** (2020). The p38 Pathway: From Biology to Cancer Therapy. *Int. J. Mol. Sci.* **21**, 1913.
- McCubrey, J. A., Lahair, M. M. and Franklin, R. A.** (2006). Reactive oxygen species-induced activation of the MAP kinase signaling pathways. *Antioxid. Redox Signal.* **8**, 1775–89.
- Nishida, T., Hattori, K. and Watanabe, K.** (2017). The regulatory and signaling mechanisms of the ASK family. *Adv. Biol. Regul.*
- Patel, P. H., Pénalva, C., Kardorff, M., Roca, M., Pavlović, B., Thiel, A., Teleman, A. A. and Edgar, B. A.** (2019). Damage sensing by a Nox-Ask1-MKK3-p38 signaling pathway mediates regeneration in the adult Drosophila midgut. *Nat. Commun.* **10**, 4365.
- Perdiguero, E., Ruiz-Bonilla, V., Gresh, L., Hui, L., Ballestar, E., Sousa-Victor, P., Baeza-Raja, B., Jardí, M., Bosch-Comas, A., Esteller, M., et al.** (2007). Genetic analysis of p38 MAP kinases in myogenesis: Fundamental role of p38 $\alpha$  in abrogating myoblast proliferation. *EMBO J.*
- Pinal, N., Calleja, M. and Morata, G.** (2019). Pro-apoptotic and pro-proliferation functions of the JNK pathway of drosophila: Roles in cell competition, tumorigenesis and regeneration. *Open Biol.* **9**,.



- Saitoh, M., Nishitoh, H., Fujii, M., Takeda, K., Tobiume, K., Sawada, Y., Kawabata, M., Miyazono, K. and Ichijo, H.** (1998). Mammalian thioredoxin is a direct inhibitor of apoptosis signal-regulating kinase (ASK) 1. *EMBO J.* **17**, 2596–2606.
- Sakauchi, C., Wakatsuki, H., Ichijo, H. and Hattori, K.** (2017). Pleiotropic properties of ASK1. *Biochim. Biophys. Acta - Gen. Subj.* **1861**, 3030–3038.
- Santabárbara-Ruiz, P., López-Santillán, M., Martínez-Rodríguez, I., Binagui-Casas, A., Pérez, L., Milán, M., Corominas, M. and Serras, F.** (2015). ROS-Induced JNK and p38 Signaling Is Required for Unpaired Cytokine Activation during *Drosophila* Regeneration. *PLoS Genet.* **11**, e1005595.
- Santabárbara-Ruiz, P., Esteban-Collado, J., Pérez, L., Viola, G., Abril, J. F., Milán, M., Corominas, M. and Serras, F.** (2019). Ask1 and Akt act synergistically to promote ROS-dependent regeneration in *Drosophila*. *PLoS Genet.* **15**, e1007926.
- Serras, F.** (2016). The benefits of oxidative stress for tissue repair and regeneration. *Fly (Austin).* **10**,.
- Shlevkov, E. and Morata, G.** (2012). A dp53/JNK-dependant feedback amplification loop is essential for the apoptotic response to stress in *Drosophila*. *Cell Death Differ.* **19**, 451–60.
- Son, Y., Kim, S., Chung, H.-T. and Pae, H.-O.** (2013). Reactive oxygen species in the activation of MAP kinases. *Methods Enzymol.* **528**, 27–48.
- Stepniak, E., Ricci, R., Eferl, R., Sumara, G., Sumara, I., Rath, M., Hui, L. and Wagner, E. F.** (2006). c-Jun/AP-1 controls liver regeneration by repressing p53/p21 and p38 MAPK activity. *Genes Dev.* **20**, 2306–2314.
- Sun, Y., Zhang, D., Li, C., Huang, J., Li, W., Qiu, Y., Mao, A., Zhou, M. and Xue, L.** (2019). Lic regulates JNK-mediated cell death in *Drosophila*. *Cell Prolif.* **52**, e12593.
- Takeda, K., Noguchi, T., Naguro, I. and Ichijo, H.** (2008). Apoptosis Signal-Regulating Kinase 1 in Stress and Immune Response. *Annu. Rev. Pharmacol. Toxicol.* **48**, 199–225.
- Terriente-Félix, A., Pérez, L., Bray, S. J., Nebreda, A. R. and Milán, M.** (2017). A *Drosophila* model of myeloproliferative neoplasm reveals a feedforward loop in the JAK pathway mediated by p38 MAPK signalling. *DMM Dis. Model. Mech.* **10**, 399–407.
- Testa, N. D., Ghosh, S. M. and Shingleton, A. W.** (2013). Sex-Specific Weight Loss Mediates Sexual Size Dimorphism in *Drosophila melanogaster*. *PLoS One* **8**, 58936.

- Toshniwal, A. G., Gupta, S., Mandal, L. and Mandal, S.** (2019). ROS Inhibits Cell Growth by Regulating 4EBP and S6K, Independent of TOR, during Development. *Dev. Cell*.
- Uhlirova, M. and Bohmann, D.** (2006). JNK- and Fos-regulated Mmp1 expression cooperates with Ras to induce invasive tumors in *Drosophila*. *EMBO J* **25**, 5294–5304.
- Wagner, E. F. and Nebreda, Á. R.** (2009). Signal integration by JNK and p38 MAPK pathways in cancer development. *Nat. Rev. Cancer*.
- Yagi, R., Mayer, F. and Basler, K.** (2010). Refined LexA transactivators and their use in combination with the *Drosophila* Gal4 system. *Proc Natl Acad Sci U S A* **107**, 16166–16171.

## Figure legends

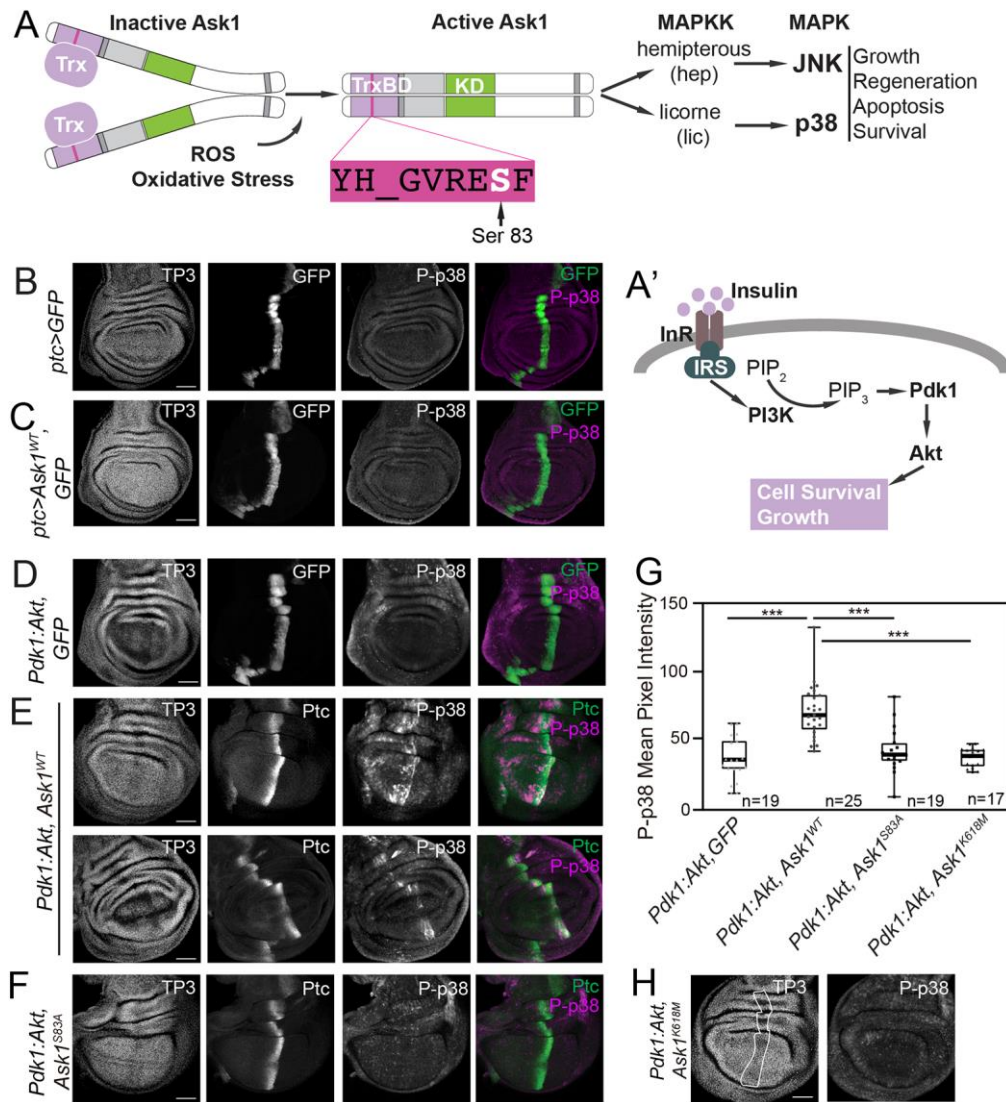

**Figure 1.** The co-expression of *Ask1* and *Pdk1:Akt* results in the activation of p38. (A) Ask/p38/JNK signaling. (A') Insulin/PI3K/Akt signaling. (B) P-p38 in GFP-expressing control, (C) in wild-type *Ask1*<sup>WT</sup>, and (D) in *Pdk1:Akt* and GFP. (E) Two examples of P-p38 after co-expressing *Pdk1:Akt* and *Ask1*<sup>WT</sup>. (F) P-p38 in *Pdk1:Akt* and *Ask1*<sup>S83A</sup>. (G) Mean pixel intensity of P-p38 for the genotypes indicated. (H) P-p38 after *Pdk1:Akt* and *Ask1*<sup>K618M</sup> co-expression. \*\*\**p* < 0.001. White line in (H): area of *ptc*> expression. TP-3: nuclei. Scale bars: 50  $\mu$ m.

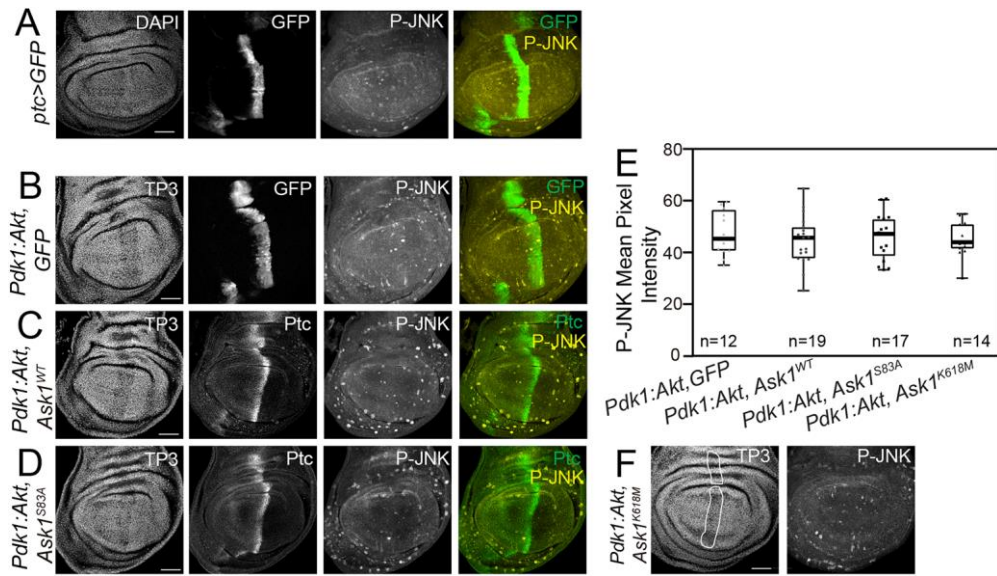

**Figure 2.** The co-expression of *Ask1* and *Pdk1:Akt* does not result in the activation of JNK. (A) P-JNK in GFP-expressing control. (B-D) P-JNK after co-expression of (B) *Pdk1:Akt* and *GFP*; (C) *Pdk1:Akt* and *Ask1<sup>WT</sup>*; or (D) *Pdk1:Akt* and *Ask1<sup>S83A</sup>*. (E) Mean pixel intensity of P-JNK for the genotypes indicated. (F) P-JNK after co-expression of *Pdk1:Akt* and *Ask1<sup>K618M</sup>*. White line in (H): area of *ptc>* expression. TP-3: nuclei. Scale bars: 50  $\mu$ m.

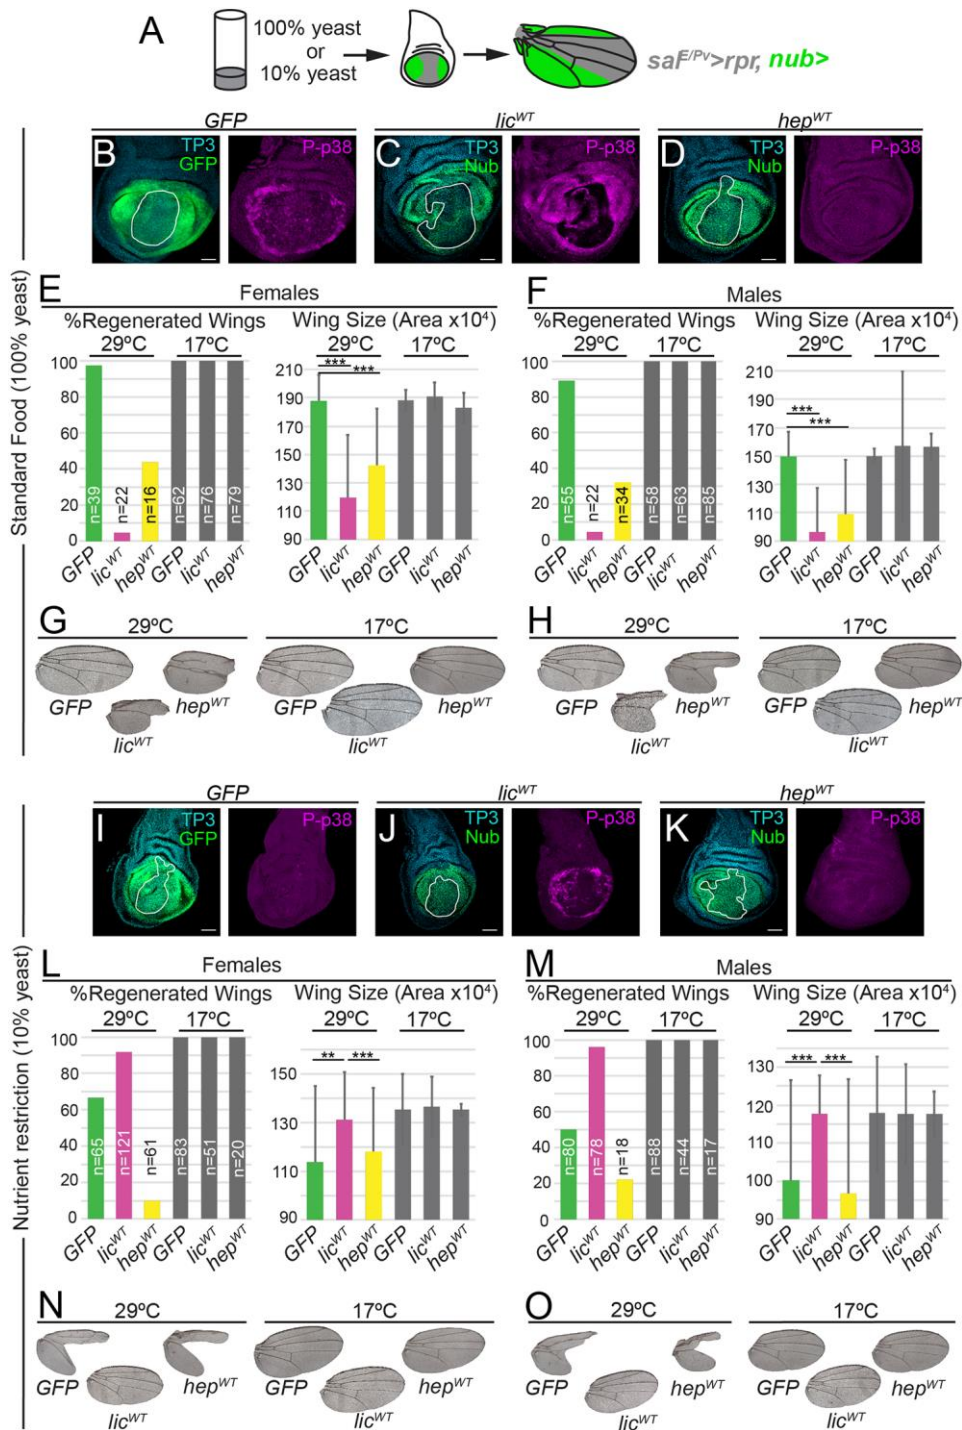

**Figure 3.** The MAPKK *licorne* (*lic<sup>WT</sup>*), but not *hemipterous* (*hep<sup>WT</sup>*), reverses the failure in regeneration caused by nutrient restriction. (A) Zones of dual transactivation. Gray, apoptotic zone generated by *sa<sup>E/Py</sup>-LHG LexO-rpr* (*sa<sup>E/Py</sup>>rpr*); green, transgene activation under *nub-Gal4* (*nub>*) to express the indicated UAS-transgene. (B-D) P-p38 of *nub>GFP* (B), of *nub>lic<sup>WT</sup>* (C) and of *nub>hep<sup>WT</sup>* (D) discs in standard food conditions. (E-F) Percentage of regenerated wings and wing areas in females and

males, respectively. (G-H) Examples of wings for indicated genotypes and temperatures. (I-K) P-p38 of *nub>GFP* (I), of *nub>lic<sup>WT</sup>* (J) and of *nub>hep<sup>WT</sup>* (K) in nutrient restriction conditions. (L-M) Percentage of regenerated wings and wing size in females and males. (N-O) Examples of wings for the indicated genotypes and temperatures. \*\*p < 0.01, \*\*\*p < 0.001. White line in the confocal images: pyknotic nuclei of apoptotic cells. TP-3: nuclei. Scale bars: 50  $\mu$ m.



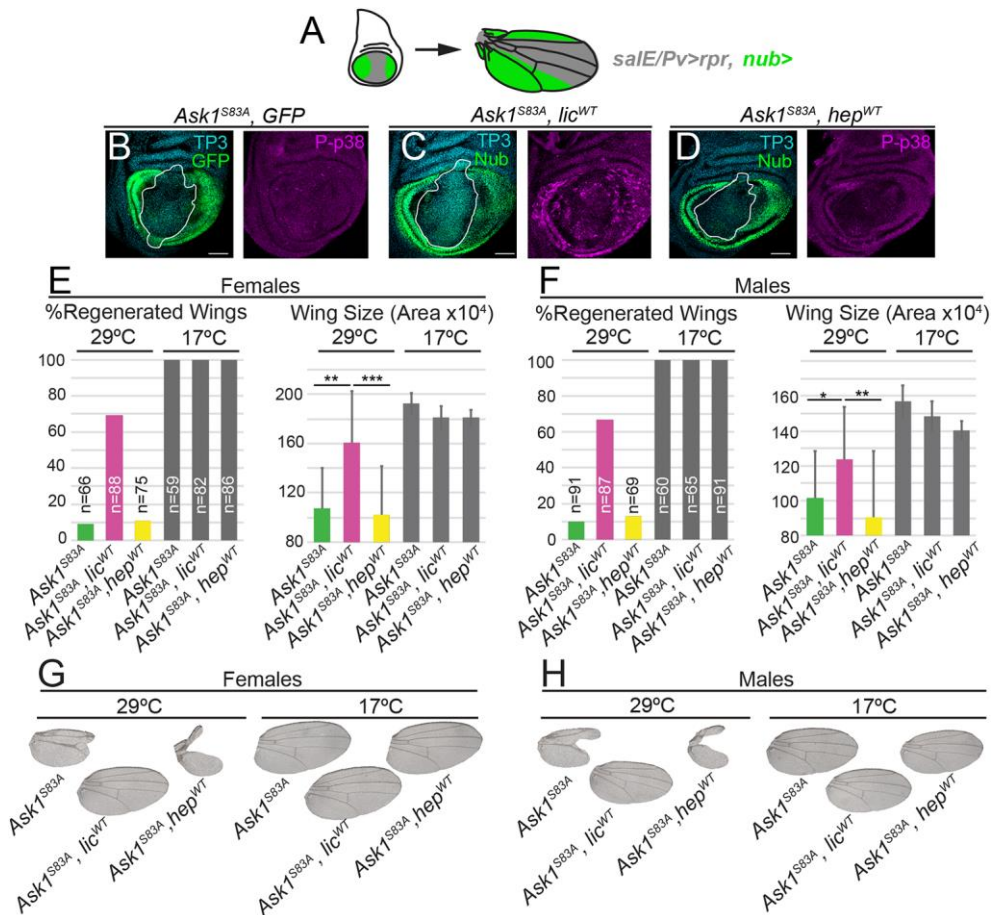

**Figure 4.** The MAPKK *licorne* (*lic*<sup>WT</sup>), but not *hemipterosus* (*hep*<sup>WT</sup>), reverses the failure in regeneration caused by *Ask*<sup>S83A</sup> expression. (A) Zones of dual transactivation. Gray, apoptotic zone (*sal*<sup>E/Pv</sup>>*rpr*); green, *nub*> zone of UAS-transgene expression. (B-D) P-p38 of *nub*>*Ask1*<sup>S83A</sup>, *GFP* (B), of *nub*>*Ask1*<sup>S83A</sup>, *lic*<sup>WT</sup> (C) and of *nub*>*Ask1*<sup>S83A</sup>, *hep*<sup>WT</sup> (D) wing discs. (E-F) Percentage of regenerated wings and wing areas in females and males. \**p* < 0.05, \*\**p* < 0.01, \*\*\**p* < 0.001. (G-H) Examples of wings. White line in the confocal images: pyknotic nuclei of apoptotic cells.. TP-3: nuclei. Scale bars: 50  $\mu$ m.



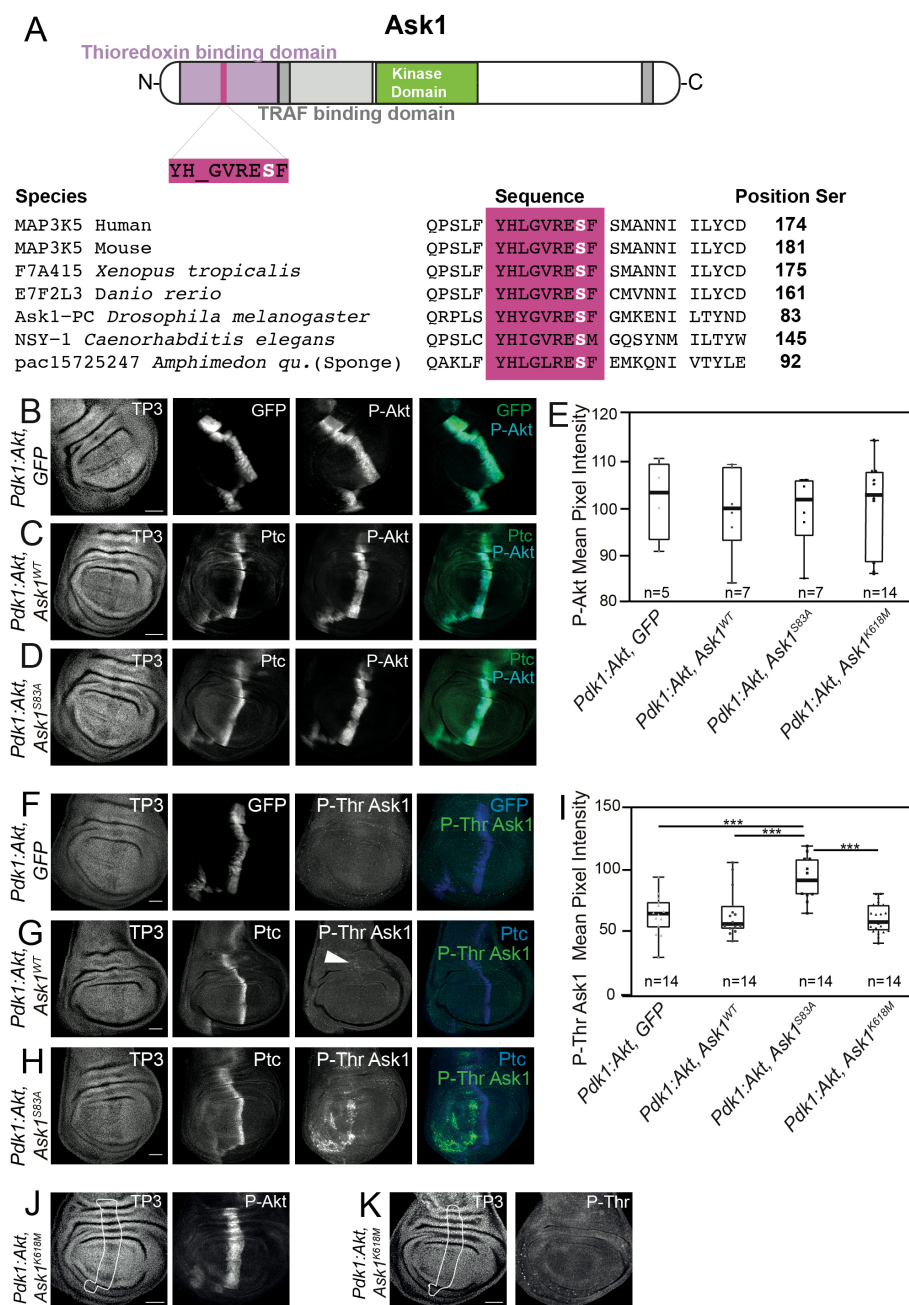

**Figure S1.** (A) The main domains of a canonical Ask1 protein. The position of the YH\_GVRESF sequence is indicated, as well as the Ser83 residue of the *Drosophila* Ask1 protein. Conservation between some organisms is shown. Note the consensus YH\_GVRESF sequence. Full comparative sequences of the Ask1 proteins are published in (Santabábara-Ruiz et al., 2019). Thioredoxin is responsive to oxidative stress and dissociates from the thioredoxin-domain to promote Ask1 activation. Dark gray, the C- and N-terminal coiled-coil domains involved in homodimerization. (B-E) Anti-P-Akt antibody staining to show the expression of *Pdk1:Akt* of the transgene

combinations indicated. (B) *Pdk1:Akt* and *GFP* co-expression; (C) *Pdk1:Akt* and *Ask1<sup>WT</sup>* co-expression; and (D) *Pdk1:Akt* and *Ask1<sup>S83A</sup>* co-expression. (E) The mean pixel intensity and quantification of the P-Akt immunofluorescence for the genotypes indicated. (F-H) Anti-P-Thr Ask1 antibody staining to show the expression of Ask1 of the transgene combinations indicated. (F) *Pdk1:Akt* and *GFP* co-expression; (G) *Pdk1:Akt* and *Ask1<sup>WT</sup>* co-expression; and (H) *Pdk1:Akt* and *Ask1<sup>S83A</sup>* co-expression. (I) The mean pixel intensity and quantification of the P-Thr Ask1 immunofluorescence for the genotypes indicated. The GFP staining corresponds to the controls. The others were stained with anti-Ptc antibody to identify the expression zone. Arrowhead points to a zone with some weak P-Thr Ask1 staining. (J) P-Akt immunofluorescence following the co-expression of *Pdk1:Akt* and *Ask1<sup>K618M</sup>*. (K) P-Thr Ask1 immunofluorescence following the co-expression of *Pdk1:Akt* and *Ask1<sup>K618M</sup>*. The stripe outlined in white indicates the zone of transgene expression. TP-3 (TO-PRO-3): nuclear staining. Scale bars: 50  $\mu\text{m}$ . \*\*\* $p < 0.001$ .

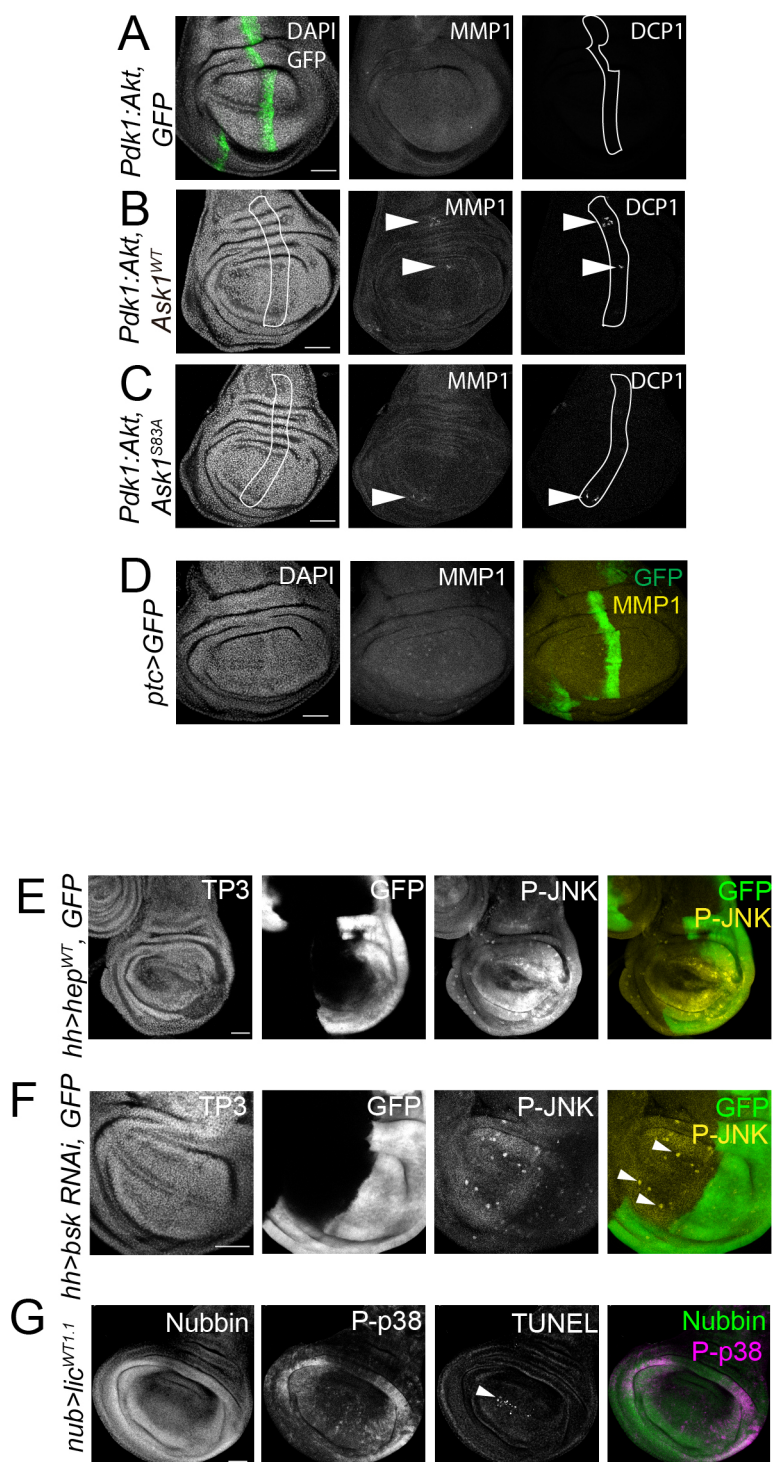

**Figure S2.** Apoptosis measured by assessing the expression of the caspase DCP1 and MMP1 after the co-expression of (A) *Pdk1:Akt* and *GFP*, (B) *Pdk1:Akt* and *Ask1<sup>WT</sup>*, or (C) *Pdk1:Akt* and *Ask1<sup>S83A</sup>*, using the *ptc>* driver (outline). The arrows indicate some apoptotic cells, which were also positive for MMP1. (D) Endogenous expression of MMP1 in *ptc>GFP* wing discs. (E-G) Validation of antibodies against proteins in the JNK and p38 pathways. (E) Anti-P-JNK antibody staining after the ectopic expression of the wild-type JNKK *hemipterous* (*hep<sup>WT</sup>*). (F) Anti-P-JNK antibody staining after the administration of RNAi against the JNK *basket* (*bsk RNAi*). The Gal4 driver used in

these experiments was *hh-Gal4*, which controls expression in the posterior compartment, allowing us to compare the staining with that of the anterior compartment. Note that for *hep<sup>WT</sup>*, the posterior compartment was smaller, likely due to apoptosis, with strong P-JNK staining. Following the expression of the *bsk RNAi*, endogenous P-JNK levels decreased. Moreover, P-JNK in mitoses (arrowheads) was reduced in the posterior (GFP) compartment. Note that both transgenes in (E) and (F) were co-expressed with *UAS-GFP*. (G) Expression of the wild-type MAPKK *licorne* (*lic<sup>WT</sup>*), stained with the anti-P-p38 antibody. The driver used here was *nub-Gal4*, which operates in the entire wing pouch. The same driver was used for the rescue experiments in Figures 3 and 4. The arrowhead indicates dead cells. An antibody against Nubbin was used to identify the *nub-Gal4* domain. TP-3 (TO-PRO-3): nuclear staining. Scale bars: 50  $\mu$ m.

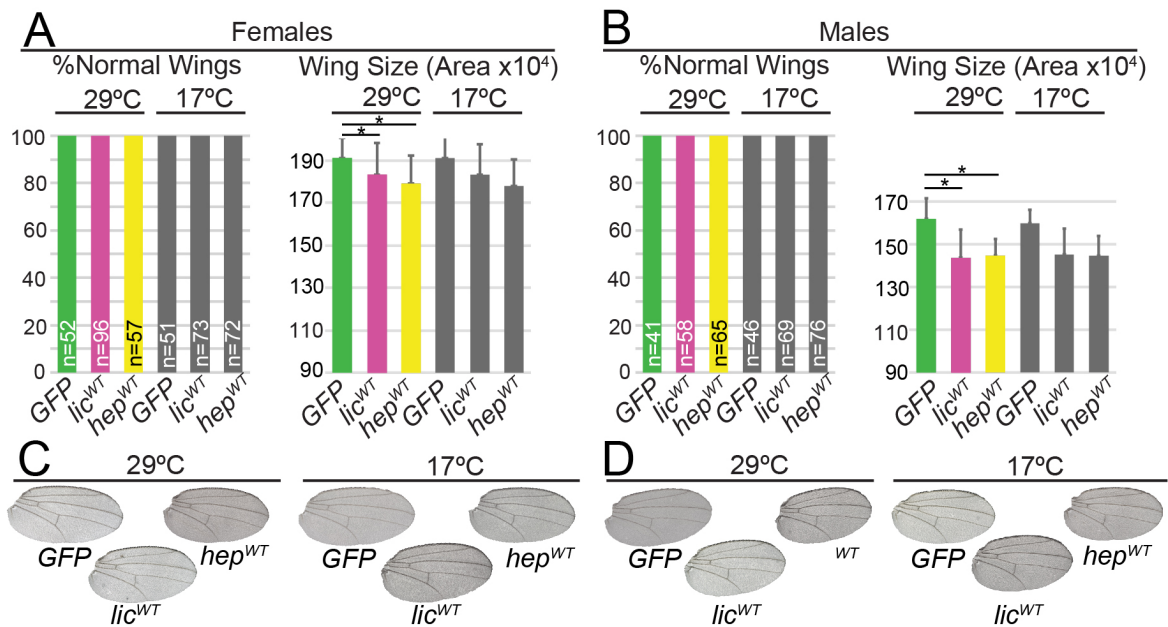

**Figure S3.** Control wing analysis of transgene expression in the absence of genetic ablation. The *nub-Gal4 UAS-GFP*, *nub-Gal4 UAS-lic<sup>WT</sup>* and *nub-Gal4 UAS-hep<sup>WT</sup>* genotypes were kept at the same temperature as those in Figures 3 and 4. (A-B) Percentage of regenerated wings and wing areas, as an indication of wing size, in females and males. Colored bars correspond to the experiments with a temperature shift to 29°C. Gray bars correspond to the experiments performed at 17°C. \**p* < 0.05. (C-D) Examples of wings obtained from the indicated genotypes and temperatures.



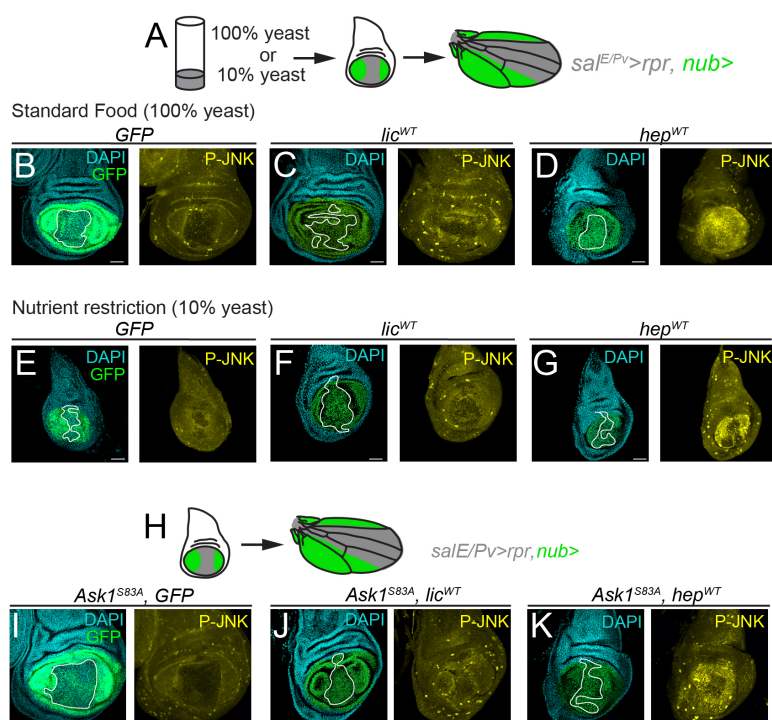

**Figure S4.** Anti-P-JNK antibody staining corresponding to the experiments in Figures 3 and 4. (A) Scheme (top) of the zones of dual transactivation in the wing disc and its corresponding zone in the adult wing in conditions of standard food or nutrient restriction. Gray, apoptotic zone generated by  $sal^{EPV}>rpr$ ; green, transgene activation under  $nub-Gal4$  ( $nub>$ ) to drive the expression of the indicated UAS transgene. Three UAS transgenes were used:  $UAS-GFP$ , as a control;  $UAS-lic^{WT}$ , to express the MAPKK *licorne*; and  $UAS-hep^{WT}$ , to express the JNKK *hemipterous*. (B-D) Anti-P-JNK antibody staining of  $nub>GFP$  (B),  $nub>lic^{WT}$  (C) and  $nub>hep^{WT}$  (D) wing discs in standard food conditions. (E-G) Anti-P-JNK antibody staining of  $nub>GFP$  (E),  $nub>lic^{WT}$  (F) and  $nub>hep^{WT}$  (G) wing discs in conditions of nutrient restriction. (H) Scheme (top) of the zones of dual transactivation in the wing disc and their corresponding zones in the adult wing. Gray, apoptotic zone ( $sal^{EPV}>rpr$ ); green, zone of transgene activation under the  $nub-Gal4$  ( $nub>$ ) driver. Three UAS transgenes were expressed together with the Ser83 mutant construct  $UAS-Ask1^{S83A}$  in standard food conditions:  $UAS-GFP$ , as a control;  $UAS-lic^{WT}$ , to express *licorne*; and  $UAS-hep^{WT}$ , to express *hemipterous*. (I-K) Anti-P-JNK antibody staining of  $nub>Ask1^{S83A}, GFP$  (I),  $nub>Ask1^{S83A}, lic^{WT}$  (J) and  $nub>Ask1^{S83A}, hep^{WT}$  (K) wing discs. The white line in the confocal images outlines the zone of apoptotic cells indicated by the pyknotic nuclei. Nuclei were stained with TO-PRO-3 (TP-3).  $UAS-GFP$  ( $GFP$ ) was used to monitor the  $nub>$  zone. In (C), (D), (F), (G), (J) and (K), the  $nub>$  zone is colored in green. Scale bars: 50  $\mu$ m.
